# Supplementary material for: TAZ2 truncation confers overactivation of p300 and cellular vulnerability to HDAC inhibition
Source: PubMed Central journal article supplement (PMC10475075; doi:10.1038/s41467-023-41245-2), 2023-09-02
Supplement: 41467_2023_41245_MOESM3_ESM.pdf [file 41467_2023_41245_MOESM3_ESM.pdf]

## **Description of Additional Supplementary Files**

File Name: Supplementary Data 1

Description: Sanger sequencing of p300/CBP TAZ2 and ZZ sgRNAs targeted loci.

File Name: Supplementary Data 2

Description: MACS2 called H3K27ac CHIP-seq peaks in OVCAR-3 and DLD-1 cells.

File Name: Supplementary Data 3

Description: MACS2 Called ATAC-seq peaks in OVCAR3.

File Name: Supplementary Data 4

Description: edgeR generated CPM and log<sub>2</sub> FC of RNA-seq in OVCAR3 and DLD-1.

File Name: Supplementary Data 5

Description: Enriched Gene Ontology Biological Processes terms in OVCAR3 and DLD-1 from DAVID Go analysis.

File Name: Supplementary Data 6

Description: Crosslinked peptides of the p300 core identified by cross-linking mass spectrometry (CLMS).

File Name: Supplementary Data 7

Description: edgeR generated log<sub>2</sub> FC and log<sub>2</sub> CPM of RNA-seq in A549.

File Name: Supplementary Data 8

Description: Enriched Gene Ontology Biological Processes terms in A549 from DAVID Go analysis.
